# Supplementary material for: Proactive vs. reactive car driving: EEG evidence for different driving strategies of older drivers
Source: PubMed Central journal article supplement (PMC5774811; doi:10.1371/journal.pone.0191500), 2018-01-19
Supplement: pone.0191500.s005.pdf [file pone.0191500.s005.pdf]

|    | Alpha<br>Power<br>[ $\mu$ V] | Theta<br>Power<br>[ $\mu$ V] | Beta<br>Power<br>[ $\mu$ V] | Channel | Wind   | Block | Subject | Group |
|----|------------------------------|------------------------------|-----------------------------|---------|--------|-------|---------|-------|
| 1  | 11.919                       | 13.006                       | 6.3329                      | FCz     | no     | 1     | 1       | Young |
| 2  | 9.6973                       | 9.6146                       | 4.8998                      | POz     | no     | 1     | 1       | Young |
| 3  | 11.691                       | 12.991                       | 6.5021                      | FCz     | weak   | 1     | 1       | Young |
| 4  | 9.032                        | 9.8694                       | 5.4284                      | POz     | weak   | 1     | 1       | Young |
| 5  | 12.484                       | 14.879                       | 6.7989                      | FCz     | strong | 1     | 1       | Young |
| 6  | 9.9876                       | 11.354                       | 5.8689                      | POz     | strong | 1     | 1       | Young |
| 7  | 12.511                       | 11.351                       | 4.9055                      | FCz     | no     | 2     | 1       | Young |
| 8  | 10.955                       | 9.158                        | 3.9445                      | POz     | no     | 2     | 1       | Young |
| 9  | 13.469                       | 14.212                       | 5.2075                      | FCz     | weak   | 2     | 1       | Young |
| 10 | 11.802                       | 10.928                       | 4.3158                      | POz     | weak   | 2     | 1       | Young |
| 11 | 11.676                       | 13.016                       | 5.2955                      | FCz     | strong | 2     | 1       | Young |
| 12 | 9.539                        | 10.136                       | 4.4159                      | POz     | strong | 2     | 1       | Young |
| 13 | 16.919                       | 16.314                       | 5.2984                      | FCz     | no     | 3     | 1       | Young |
| 14 | 15.091                       | 13.123                       | 4.2125                      | POz     | no     | 3     | 1       | Young |
| 15 | 14.196                       | 14.505                       | 4.9727                      | FCz     | weak   | 3     | 1       | Young |
| 16 | 12.519                       | 13.221                       | 4.2519                      | POz     | weak   | 3     | 1       | Young |
| 17 | 15.571                       | 17.9                         | 4.7781                      | FCz     | strong | 3     | 1       | Young |
| 18 | 12.942                       | 13.64                        | 4.4574                      | POz     | strong | 3     | 1       | Young |
| 19 | 28.184                       | 25.821                       | 14.841                      | FCz     | no     | 1     | 2       | Young |
| 20 | 9.9901                       | 8.2959                       | 7.0501                      | POz     | no     | 1     | 2       | Young |
| 21 | 30.308                       | 29.193                       | 14.234                      | FCz     | weak   | 1     | 2       | Young |
| 22 | 9.6367                       | 7.8233                       | 6.6008                      | POz     | weak   | 1     | 2       | Young |
| 23 | 30.197                       | 30.712                       | 15.858                      | FCz     | strong | 1     | 2       | Young |
| 24 | 9.2374                       | 7.7611                       | 7.3919                      | POz     | strong | 1     | 2       | Young |
| 25 | 34.241                       | 27.424                       | 15.647                      | FCz     | no     | 2     | 2       | Young |
| 26 | 12.404                       | 8.6141                       | 6.2489                      | POz     | no     | 2     | 2       | Young |
| 27 | 28.808                       | 26.832                       | 13.662                      | FCz     | weak   | 2     | 2       | Young |
| 28 | 10.401                       | 8.1415                       | 5.7839                      | POz     | weak   | 2     | 2       | Young |
| 29 | 29.435                       | 27.665                       | 13.942                      | FCz     | strong | 2     | 2       | Young |
| 30 | 9.9304                       | 8.1388                       | 6.2572                      | POz     | strong | 2     | 2       | Young |
| 31 | 37.952                       | 25.779                       | 17.539                      | FCz     | no     | 3     | 2       | Young |
| 32 | 14.584                       | 8.9965                       | 6.5762                      | POz     | no     | 3     | 2       | Young |
| 33 | 34.466                       | 25.994                       | 16.548                      | FCz     | weak   | 3     | 2       | Young |
| 34 | 12.148                       | 7.6678                       | 6.2126                      | POz     | weak   | 3     | 2       | Young |
| 35 | 33.44                        | 27.232                       | 14.876                      | FCz     | strong | 3     | 2       | Young |
| 36 | 11.45                        | 8.3475                       | 6.0143                      | POz     | strong | 3     | 2       | Young |
| 37 | 11.433                       | 9.8833                       | 6.2351                      | FCz     | no     | 1     | 3       | Young |
| 38 | 11.14                        | 6.3596                       | 4.1973                      | POz     | no     | 1     | 3       | Young |
| 39 | 11.817                       | 11.497                       | 6.5679                      | FCz     | weak   | 1     | 3       | Young |
| 40 | 11.339                       | 5.9571                       | 4.2605                      | POz     | weak   | 1     | 3       | Young |
| 41 | 10.484                       | 11.119                       | 6.5293                      | FCz     | strong | 1     | 3       | Young |

|    |        |        |        |     |        |   |   |       |
|----|--------|--------|--------|-----|--------|---|---|-------|
| 42 | 8.8196 | 6.4835 | 4.3765 | POz | strong | 1 | 3 | Young |
| 43 | 13.53  | 10.506 | 7.1117 | FCz | no     | 2 | 3 | Young |
| 44 | 14.132 | 5.8525 | 4.1719 | POz | no     | 2 | 3 | Young |
| 45 | 13.517 | 10.934 | 6.7243 | FCz | weak   | 2 | 3 | Young |
| 46 | 11.065 | 6.0615 | 4.0947 | POz | weak   | 2 | 3 | Young |
| 47 | 12.403 | 10.597 | 6.3595 | FCz | strong | 2 | 3 | Young |
| 48 | 10.005 | 6.0532 | 3.9948 | POz | strong | 2 | 3 | Young |
| 49 | 13.412 | 11.246 | 6.6378 | FCz | no     | 3 | 3 | Young |
| 50 | 12.222 | 6.6814 | 3.7974 | POz | no     | 3 | 3 | Young |
| 51 | 13.506 | 10.865 | 6.9986 | FCz | weak   | 3 | 3 | Young |
| 52 | 9.8644 | 5.945  | 4.0593 | POz | weak   | 3 | 3 | Young |
| 53 | 12.935 | 9.9909 | 6.8374 | FCz | strong | 3 | 3 | Young |
| 54 | 10.7   | 5.6738 | 4.1015 | POz | strong | 3 | 3 | Young |
| 55 | 104.63 | 23.202 | 17.827 | FCz | no     | 1 | 4 | Young |
| 56 | 180.29 | 30.174 | 24.771 | POz | no     | 1 | 4 | Young |
| 57 | 104.6  | 21.353 | 17.425 | FCz | weak   | 1 | 4 | Young |
| 58 | 135.73 | 26.825 | 23.798 | POz | weak   | 1 | 4 | Young |
| 59 | 89.888 | 23.269 | 18.359 | FCz | strong | 1 | 4 | Young |
| 60 | 116.93 | 26.525 | 24.78  | POz | strong | 1 | 4 | Young |
| 61 | 184.84 | 25.547 | 24.007 | FCz | no     | 2 | 4 | Young |
| 62 | 262.06 | 41.289 | 25.841 | POz | no     | 2 | 4 | Young |
| 63 | 187.25 | 31.849 | 21.984 | FCz | weak   | 2 | 4 | Young |
| 64 | 263.75 | 36.051 | 24.821 | POz | weak   | 2 | 4 | Young |
| 65 | 165.88 | 25.352 | 21.332 | FCz | strong | 2 | 4 | Young |
| 66 | 187.03 | 32.549 | 23.558 | POz | strong | 2 | 4 | Young |
| 67 | 189.16 | 24.352 | 19.744 | FCz | no     | 3 | 4 | Young |
| 68 | 334.51 | 33.08  | 24.511 | POz | no     | 3 | 4 | Young |
| 69 | 205.11 | 31.135 | 21.95  | FCz | weak   | 3 | 4 | Young |
| 70 | 321.06 | 36.631 | 22.71  | POz | weak   | 3 | 4 | Young |
| 71 | 175.32 | 27.897 | 21.834 | FCz | strong | 3 | 4 | Young |
| 72 | 206.83 | 31.026 | 22.036 | POz | strong | 3 | 4 | Young |
| 73 | 38.106 | 24.772 | 13.487 | FCz | no     | 1 | 5 | Young |
| 74 | 71.425 | 27.467 | 15.747 | POz | no     | 1 | 5 | Young |
| 75 | 41.662 | 22.976 | 12.493 | FCz | weak   | 1 | 5 | Young |
| 76 | 63.641 | 24.96  | 14.602 | POz | weak   | 1 | 5 | Young |
| 77 | 54.205 | 25.309 | 13.028 | FCz | strong | 1 | 5 | Young |
| 78 | 78.479 | 28.48  | 14.959 | POz | strong | 1 | 5 | Young |
| 79 | 116.09 | 26.897 | 17.25  | FCz | no     | 2 | 5 | Young |
| 80 | 188.57 | 33.664 | 19.535 | POz | no     | 2 | 5 | Young |
| 81 | 111.64 | 26.572 | 16.655 | FCz | weak   | 2 | 5 | Young |
| 82 | 218.34 | 35.733 | 20.424 | POz | weak   | 2 | 5 | Young |
| 83 | 94.204 | 28.374 | 16.378 | FCz | strong | 2 | 5 | Young |
| 84 | 142.46 | 29.838 | 17.038 | POz | strong | 2 | 5 | Young |
| 85 | 74.996 | 24.527 | 15.084 | FCz | no     | 3 | 5 | Young |
| 86 | 137.32 | 26.739 | 16.959 | POz | no     | 3 | 5 | Young |

|     |        |        |        |     |        |   |   |       |
|-----|--------|--------|--------|-----|--------|---|---|-------|
| 87  | 86.613 | 25.703 | 15.427 | FCz | weak   | 3 | 5 | Young |
| 88  | 114.63 | 26.796 | 15.224 | POz | weak   | 3 | 5 | Young |
| 89  | 84.977 | 25.175 | 15.198 | FCz | strong | 3 | 5 | Young |
| 90  | 108.79 | 28.426 | 14.851 | POz | strong | 3 | 5 | Young |
| 91  | 19.237 | 25.404 | 7.3163 | FCz | no     | 1 | 6 | Young |
| 92  | 21.434 | 15.085 | 5.1916 | POz | no     | 1 | 6 | Young |
| 93  | 21.451 | 24.667 | 7.3987 | FCz | weak   | 1 | 6 | Young |
| 94  | 20.859 | 14.037 | 4.898  | POz | weak   | 1 | 6 | Young |
| 95  | 22.006 | 23.325 | 6.6747 | FCz | strong | 1 | 6 | Young |
| 96  | 19.068 | 15.368 | 4.6869 | POz | strong | 1 | 6 | Young |
| 97  | 20.843 | 22.401 | 6.9986 | FCz | no     | 2 | 6 | Young |
| 98  | 19.554 | 12.48  | 4.9609 | POz | no     | 2 | 6 | Young |
| 99  | 21.314 | 21.867 | 7.6721 | FCz | weak   | 2 | 6 | Young |
| 100 | 19.454 | 12.774 | 5.4372 | POz | weak   | 2 | 6 | Young |
| 101 | 19.338 | 20.291 | 7.1474 | FCz | strong | 2 | 6 | Young |
| 102 | 19.7   | 12.743 | 4.8775 | POz | strong | 2 | 6 | Young |
| 103 | 20.626 | 21.313 | 7.5546 | FCz | no     | 3 | 6 | Young |
| 104 | 20.123 | 12.946 | 4.7711 | POz | no     | 3 | 6 | Young |
| 105 | 20.728 | 21.612 | 6.7858 | FCz | weak   | 3 | 6 | Young |
| 106 | 18.907 | 12.533 | 4.569  | POz | weak   | 3 | 6 | Young |
| 107 | 18.957 | 20.659 | 6.7943 | FCz | strong | 3 | 6 | Young |
| 108 | 17.423 | 12.48  | 4.6702 | POz | strong | 3 | 6 | Young |
| 109 | 12.234 | 22.836 | 8.1899 | FCz | no     | 1 | 7 | Young |
| 110 | 23.108 | 21.894 | 12.209 | POz | no     | 1 | 7 | Young |
| 111 | 13.64  | 25.651 | 8.6428 | FCz | weak   | 1 | 7 | Young |
| 112 | 20.068 | 21.963 | 12.585 | POz | weak   | 1 | 7 | Young |
| 113 | 12.819 | 25.706 | 8.2781 | FCz | strong | 1 | 7 | Young |
| 114 | 17.981 | 21.238 | 12.181 | POz | strong | 1 | 7 | Young |
| 115 | 13.731 | 23.546 | 8.8078 | FCz | no     | 2 | 7 | Young |
| 116 | 25.894 | 19.664 | 11.915 | POz | no     | 2 | 7 | Young |
| 117 | 14.326 | 24.432 | 9.3949 | FCz | weak   | 2 | 7 | Young |
| 118 | 24.087 | 21.138 | 12.179 | POz | weak   | 2 | 7 | Young |
| 119 | 15.25  | 24.962 | 8.3937 | FCz | strong | 2 | 7 | Young |
| 120 | 21.122 | 21.568 | 11.39  | POz | strong | 2 | 7 | Young |
| 121 | 14.916 | 22.819 | 9.5286 | FCz | no     | 3 | 7 | Young |
| 122 | 24.201 | 22.326 | 11.905 | POz | no     | 3 | 7 | Young |
| 123 | 14.668 | 24.741 | 8.6867 | FCz | weak   | 3 | 7 | Young |
| 124 | 22.429 | 21.218 | 11.711 | POz | weak   | 3 | 7 | Young |
| 125 | 14.251 | 24.027 | 8.6405 | FCz | strong | 3 | 7 | Young |
| 126 | 20.493 | 19.406 | 11.224 | POz | strong | 3 | 7 | Young |
| 127 | 8.4663 | 7.3133 | 4.919  | FCz | no     | 1 | 8 | Young |
| 128 | 3.4014 | 2.6713 | 2.1328 | POz | no     | 1 | 8 | Young |
| 129 | 7.5742 | 7.3935 | 4.9224 | FCz | weak   | 1 | 8 | Young |
| 130 | 3.0049 | 2.6543 | 2.1681 | POz | weak   | 1 | 8 | Young |
| 131 | 7.7497 | 6.6636 | 4.6014 | FCz | strong | 1 | 8 | Young |

|     |        |        |        |     |        |   |    |       |
|-----|--------|--------|--------|-----|--------|---|----|-------|
| 132 | 3.3432 | 2.6162 | 2.1407 | POz | strong | 1 | 8  | Young |
| 133 | 8.2541 | 6.3688 | 4.3124 | FCz | no     | 2 | 8  | Young |
| 134 | 3.0196 | 2.4369 | 1.8298 | POz | no     | 2 | 8  | Young |
| 135 | 7.8741 | 5.9757 | 4.0319 | FCz | weak   | 2 | 8  | Young |
| 136 | 2.7742 | 2.4105 | 1.8249 | POz | weak   | 2 | 8  | Young |
| 137 | 7.3243 | 6.2154 | 4.0802 | FCz | strong | 2 | 8  | Young |
| 138 | 2.9824 | 2.3837 | 1.8257 | POz | strong | 2 | 8  | Young |
| 139 | 8.1799 | 6.7037 | 4.1786 | FCz | no     | 3 | 8  | Young |
| 140 | 3.1514 | 2.2531 | 1.7755 | POz | no     | 3 | 8  | Young |
| 141 | 6.477  | 5.3516 | 3.587  | FCz | weak   | 3 | 8  | Young |
| 142 | 2.7171 | 2.2122 | 1.6753 | POz | weak   | 3 | 8  | Young |
| 143 | 7.2554 | 6.1647 | 3.7486 | FCz | strong | 3 | 8  | Young |
| 144 | 3.5119 | 2.4632 | 1.7868 | POz | strong | 3 | 8  | Young |
| 145 | 15.985 | 15.321 | 7.5336 | FCz | no     | 1 | 9  | Young |
| 146 | 10.379 | 7.9401 | 4.3184 | POz | no     | 1 | 9  | Young |
| 147 | 16.86  | 15.24  | 7.3009 | FCz | weak   | 1 | 9  | Young |
| 148 | 10.386 | 7.9477 | 4.3166 | POz | weak   | 1 | 9  | Young |
| 149 | 16.011 | 16.407 | 6.9271 | FCz | strong | 1 | 9  | Young |
| 150 | 10.143 | 8.1925 | 3.8177 | POz | strong | 1 | 9  | Young |
| 151 | 17.724 | 15.898 | 8.8315 | FCz | no     | 2 | 9  | Young |
| 152 | 11.458 | 8.3326 | 4.9779 | POz | no     | 2 | 9  | Young |
| 153 | 20.282 | 16.083 | 8.2513 | FCz | weak   | 2 | 9  | Young |
| 154 | 11.117 | 8.2617 | 4.571  | POz | weak   | 2 | 9  | Young |
| 155 | 17.773 | 16.171 | 7.9974 | FCz | strong | 2 | 9  | Young |
| 156 | 9.8185 | 7.868  | 4.7689 | POz | strong | 2 | 9  | Young |
| 157 | 17.456 | 17.251 | 9.5301 | FCz | no     | 3 | 9  | Young |
| 158 | 9.4281 | 9.4372 | 5.4412 | POz | no     | 3 | 9  | Young |
| 159 | 19.213 | 15.622 | 8.7174 | FCz | weak   | 3 | 9  | Young |
| 160 | 10.333 | 8.7356 | 4.9661 | POz | weak   | 3 | 9  | Young |
| 161 | 18.217 | 14.792 | 8.1059 | FCz | strong | 3 | 9  | Young |
| 162 | 9.4012 | 7.5252 | 4.4953 | POz | strong | 3 | 9  | Young |
| 163 | 68.521 | 25.41  | 18.242 | FCz | no     | 1 | 10 | Young |
| 164 | 60.543 | 18.264 | 15.216 | POz | no     | 1 | 10 | Young |
| 165 | 67.86  | 26.777 | 18.451 | FCz | weak   | 1 | 10 | Young |
| 166 | 61.209 | 16.401 | 18.484 | POz | weak   | 1 | 10 | Young |
| 167 | 55.293 | 27.907 | 19.749 | FCz | strong | 1 | 10 | Young |
| 168 | 41.689 | 15.126 | 20.613 | POz | strong | 1 | 10 | Young |
| 169 | 63.775 | 26.045 | 22.581 | FCz | no     | 2 | 10 | Young |
| 170 | 48.601 | 19.753 | 21.73  | POz | no     | 2 | 10 | Young |
| 171 | 59.326 | 26.869 | 22.205 | FCz | weak   | 2 | 10 | Young |
| 172 | 48.888 | 16.697 | 23.213 | POz | weak   | 2 | 10 | Young |
| 173 | 58.328 | 27.107 | 22.912 | FCz | strong | 2 | 10 | Young |
| 174 | 49.282 | 16.065 | 23.565 | POz | strong | 2 | 10 | Young |
| 175 | 68.527 | 29.68  | 23.4   | FCz | no     | 3 | 10 | Young |
| 176 | 59.928 | 17.087 | 23.878 | POz | no     | 3 | 10 | Young |

|     |        |        |        |     |        |   |    |       |
|-----|--------|--------|--------|-----|--------|---|----|-------|
| 177 | 65.502 | 25.708 | 22.13  | FCz | weak   | 3 | 10 | Young |
| 178 | 53.081 | 16.389 | 21.463 | POz | weak   | 3 | 10 | Young |
| 179 | 66.763 | 25.656 | 24.162 | FCz | strong | 3 | 10 | Young |
| 180 | 54.842 | 16.583 | 25.175 | POz | strong | 3 | 10 | Young |
| 181 | 18.61  | 14.914 | 8.1422 | FCz | no     | 1 | 11 | Young |
| 182 | 15.318 | 9.6256 | 9.417  | POz | no     | 1 | 11 | Young |
| 183 | 13.58  | 13.207 | 7.6638 | FCz | weak   | 1 | 11 | Young |
| 184 | 11.568 | 9.5844 | 9.5407 | POz | weak   | 1 | 11 | Young |
| 185 | 12.833 | 15.138 | 7.4801 | FCz | strong | 1 | 11 | Young |
| 186 | 10.347 | 8.8504 | 8.8528 | POz | strong | 1 | 11 | Young |
| 187 | 23.299 | 16.876 | 11.534 | FCz | no     | 2 | 11 | Young |
| 188 | 17.265 | 11.773 | 10.696 | POz | no     | 2 | 11 | Young |
| 189 | 21.35  | 15.288 | 10.27  | FCz | weak   | 2 | 11 | Young |
| 190 | 13.974 | 9.7511 | 10.34  | POz | weak   | 2 | 11 | Young |
| 191 | 17.643 | 14.42  | 9.4572 | FCz | strong | 2 | 11 | Young |
| 192 | 14.826 | 9.8358 | 9.583  | POz | strong | 2 | 11 | Young |
| 193 | 32.724 | 18.635 | 13.949 | FCz | no     | 3 | 11 | Young |
| 194 | 20.927 | 12.056 | 12.412 | POz | no     | 3 | 11 | Young |
| 195 | 24.22  | 17.31  | 13.249 | FCz | weak   | 3 | 11 | Young |
| 196 | 16.303 | 12.303 | 11.352 | POz | weak   | 3 | 11 | Young |
| 197 | 22.916 | 17.033 | 12.725 | FCz | strong | 3 | 11 | Young |
| 198 | 16.042 | 11.704 | 11.655 | POz | strong | 3 | 11 | Young |
| 199 | 27.546 | 30.441 | 14.179 | FCz | no     | 1 | 12 | Young |
| 200 | 27.935 | 24.661 | 17.129 | POz | no     | 1 | 12 | Young |
| 201 | 25.885 | 29     | 13.595 | FCz | weak   | 1 | 12 | Young |
| 202 | 27.316 | 26.562 | 17.653 | POz | weak   | 1 | 12 | Young |
| 203 | 26.422 | 30.504 | 15.086 | FCz | strong | 1 | 12 | Young |
| 204 | 27.334 | 23.481 | 18.278 | POz | strong | 1 | 12 | Young |
| 205 | 26.732 | 28.17  | 15.799 | FCz | no     | 2 | 12 | Young |
| 206 | 26.702 | 24.036 | 18.641 | POz | no     | 2 | 12 | Young |
| 207 | 26.514 | 27.624 | 13.732 | FCz | weak   | 2 | 12 | Young |
| 208 | 27.735 | 25.419 | 16.945 | POz | weak   | 2 | 12 | Young |
| 209 | 29.29  | 29.294 | 17.439 | FCz | strong | 2 | 12 | Young |
| 210 | 29.703 | 25.876 | 20.84  | POz | strong | 2 | 12 | Young |
| 211 | 24.958 | 26.839 | 12.41  | FCz | no     | 3 | 12 | Young |
| 212 | 25.162 | 21.116 | 15.89  | POz | no     | 3 | 12 | Young |
| 213 | 26.971 | 27.858 | 13.013 | FCz | weak   | 3 | 12 | Young |
| 214 | 29.07  | 26.969 | 16.895 | POz | weak   | 3 | 12 | Young |
| 215 | 27.307 | 29.009 | 14.159 | FCz | strong | 3 | 12 | Young |
| 216 | 29.382 | 24.211 | 18.728 | POz | strong | 3 | 12 | Young |
| 217 | 14.029 | 9.5521 | 8.7641 | FCz | no     | 1 | 13 | Young |
| 218 | 34.919 | 8.9638 | 6.0117 | POz | no     | 1 | 13 | Young |
| 219 | 11.948 | 8.6588 | 7.9487 | FCz | weak   | 1 | 13 | Young |
| 220 | 26.884 | 8.8965 | 5.8365 | POz | weak   | 1 | 13 | Young |
| 221 | 10.242 | 9.3852 | 6.6443 | FCz | strong | 1 | 13 | Young |

|     |        |        |        |     |        |   |    |         |
|-----|--------|--------|--------|-----|--------|---|----|---------|
| 222 | 20.505 | 8.6752 | 5.1513 | POz | strong | 1 | 13 | Young   |
| 223 | 14.502 | 8.4566 | 8.229  | FCz | no     | 2 | 13 | Young   |
| 224 | 31.763 | 9.1446 | 5.8758 | POz | no     | 2 | 13 | Young   |
| 225 | 13.599 | 8.5245 | 7.4907 | FCz | weak   | 2 | 13 | Young   |
| 226 | 31.464 | 8.5524 | 5.5552 | POz | weak   | 2 | 13 | Young   |
| 227 | 11.509 | 9.1306 | 7.267  | FCz | strong | 2 | 13 | Young   |
| 228 | 26.842 | 8.7568 | 5.3846 | POz | strong | 2 | 13 | Young   |
| 229 | 17.307 | 9.1704 | 8.0025 | FCz | no     | 3 | 13 | Young   |
| 230 | 38.58  | 9.7098 | 5.8175 | POz | no     | 3 | 13 | Young   |
| 231 | 14.921 | 9.9369 | 7.5082 | FCz | weak   | 3 | 13 | Young   |
| 232 | 33.233 | 9.4186 | 6.0217 | POz | weak   | 3 | 13 | Young   |
| 233 | 13.871 | 8.9858 | 6.661  | FCz | strong | 3 | 13 | Young   |
| 234 | 26.688 | 9.6477 | 5.5165 | POz | strong | 3 | 13 | Young   |
| 235 | 9.1551 | 14.756 | 6.2777 | FCz | no     | 1 | 14 | Young   |
| 236 | 8.4144 | 8.985  | 6.9174 | POz | no     | 1 | 14 | Young   |
| 237 | 9.3403 | 15.008 | 6.6221 | FCz | weak   | 1 | 14 | Young   |
| 238 | 8.6541 | 8.9119 | 7.1242 | POz | weak   | 1 | 14 | Young   |
| 239 | 8.6724 | 15.012 | 6.487  | FCz | strong | 1 | 14 | Young   |
| 240 | 8.6464 | 8.2275 | 7.126  | POz | strong | 1 | 14 | Young   |
| 241 | 8.8413 | 12.82  | 6.5089 | FCz | no     | 2 | 14 | Young   |
| 242 | 8.7373 | 7.9085 | 7.0394 | POz | no     | 2 | 14 | Young   |
| 243 | 8.7811 | 13.919 | 6.3252 | FCz | weak   | 2 | 14 | Young   |
| 244 | 8.1286 | 8.0572 | 6.8881 | POz | weak   | 2 | 14 | Young   |
| 245 | 8.6011 | 14.141 | 6.7761 | FCz | strong | 2 | 14 | Young   |
| 246 | 8.9484 | 8.734  | 7.3178 | POz | strong | 2 | 14 | Young   |
| 247 | 9.912  | 13.877 | 7.9384 | FCz | no     | 3 | 14 | Young   |
| 248 | 10.737 | 8.6379 | 9.176  | POz | no     | 3 | 14 | Young   |
| 249 | 10.315 | 14.096 | 8.0288 | FCz | weak   | 3 | 14 | Young   |
| 250 | 9.7964 | 7.8528 | 8.8638 | POz | weak   | 3 | 14 | Young   |
| 251 | 10.274 | 15.666 | 8.02   | FCz | strong | 3 | 14 | Young   |
| 252 | 9.6282 | 9.1992 | 9.4591 | POz | strong | 3 | 14 | Young   |
| 253 | 22.818 | 12.278 | 12.876 | FCz | no     | 1 | 15 | Old-Low |
| 254 | 14.539 | 8.7766 | 9.5864 | POz | no     | 1 | 15 | Old-Low |
| 255 | 20.86  | 13.585 | 10.987 | FCz | weak   | 1 | 15 | Old-Low |
| 256 | 13.807 | 9.318  | 9.2638 | POz | weak   | 1 | 15 | Old-Low |
| 257 | 21.273 | 12.558 | 11.843 | FCz | strong | 1 | 15 | Old-Low |
| 258 | 14.488 | 8.9833 | 9.3617 | POz | strong | 1 | 15 | Old-Low |
| 259 | 27.223 | 15.119 | 14.208 | FCz | no     | 2 | 15 | Old-Low |
| 260 | 18.141 | 12.294 | 10.436 | POz | no     | 2 | 15 | Old-Low |
| 261 | 27.684 | 13.983 | 12.211 | FCz | weak   | 2 | 15 | Old-Low |
| 262 | 18.071 | 10.063 | 8.8834 | POz | weak   | 2 | 15 | Old-Low |
| 263 | 24.743 | 11.978 | 10.811 | FCz | strong | 2 | 15 | Old-Low |
| 264 | 16.355 | 9.5823 | 8.6241 | POz | strong | 2 | 15 | Old-Low |
| 265 | 28.819 | 14.663 | 15.027 | FCz | no     | 3 | 15 | Old-Low |
| 266 | 20.105 | 11.115 | 10.556 | POz | no     | 3 | 15 | Old-Low |

|     |        |        |        |     |        |   |    |         |
|-----|--------|--------|--------|-----|--------|---|----|---------|
| 267 | 29.229 | 13.385 | 13.334 | FCz | weak   | 3 | 15 | Old-Low |
| 268 | 19.246 | 10.362 | 10.214 | POz | weak   | 3 | 15 | Old-Low |
| 269 | 25.372 | 12.868 | 12.479 | FCz | strong | 3 | 15 | Old-Low |
| 270 | 16.495 | 9.7666 | 9.2449 | POz | strong | 3 | 15 | Old-Low |
| 271 | 4.1839 | 2.2467 | 12.021 | FCz | no     | 1 | 16 | Old-Low |
| 272 | 4.6039 | 3.1213 | 11.092 | POz | no     | 1 | 16 | Old-Low |
| 273 | 3.8403 | 2.3444 | 13.012 | FCz | weak   | 1 | 16 | Old-Low |
| 274 | 4.3293 | 3.1842 | 11.96  | POz | weak   | 1 | 16 | Old-Low |
| 275 | 4.4607 | 2.5117 | 14.703 | FCz | strong | 1 | 16 | Old-Low |
| 276 | 5.1023 | 3.2686 | 13.824 | POz | strong | 1 | 16 | Old-Low |
| 277 | 4.2103 | 2.4081 | 10.359 | FCz | no     | 2 | 16 | Old-Low |
| 278 | 5.2917 | 3.3317 | 10.456 | POz | no     | 2 | 16 | Old-Low |
| 279 | 4.0673 | 2.3794 | 9.4325 | FCz | weak   | 2 | 16 | Old-Low |
| 280 | 5.0489 | 3.4191 | 9.7755 | POz | weak   | 2 | 16 | Old-Low |
| 281 | 4.0238 | 2.2492 | 11.332 | FCz | strong | 2 | 16 | Old-Low |
| 282 | 5.1577 | 3.3855 | 11.52  | POz | strong | 2 | 16 | Old-Low |
| 283 | 4.7894 | 2.2668 | 8.7512 | FCz | no     | 3 | 16 | Old-Low |
| 284 | 5.8061 | 3.5367 | 9.6349 | POz | no     | 3 | 16 | Old-Low |
| 285 | 4.9164 | 2.4916 | 9.7122 | FCz | weak   | 3 | 16 | Old-Low |
| 286 | 5.8339 | 3.7941 | 11.111 | POz | weak   | 3 | 16 | Old-Low |
| 287 | 3.7746 | 2.1346 | 7.116  | FCz | strong | 3 | 16 | Old-Low |
| 288 | 4.4585 | 3.2735 | 7.7441 | POz | strong | 3 | 16 | Old-Low |
| 289 | 7.9975 | 5.49   | 10.182 | FCz | no     | 1 | 17 | Old-Low |
| 290 | 6.6867 | 3.8411 | 9.6729 | POz | no     | 1 | 17 | Old-Low |
| 291 | 8.1443 | 5.4913 | 10.686 | FCz | weak   | 1 | 17 | Old-Low |
| 292 | 7.4852 | 4.1442 | 11.25  | POz | weak   | 1 | 17 | Old-Low |
| 293 | 8.8    | 5.5177 | 10.76  | FCz | strong | 1 | 17 | Old-Low |
| 294 | 7.6141 | 4.2185 | 11.346 | POz | strong | 1 | 17 | Old-Low |
| 295 | 8.529  | 6.2918 | 9.2218 | FCz | no     | 2 | 17 | Old-Low |
| 296 | 6.6158 | 4.1185 | 7.8788 | POz | no     | 2 | 17 | Old-Low |
| 297 | 8.5363 | 5.232  | 9.455  | FCz | weak   | 2 | 17 | Old-Low |
| 298 | 6.9069 | 3.4878 | 8.9798 | POz | weak   | 2 | 17 | Old-Low |
| 299 | 8.3172 | 5.5493 | 8.3166 | FCz | strong | 2 | 17 | Old-Low |
| 300 | 6.7599 | 3.5783 | 7.7505 | POz | strong | 2 | 17 | Old-Low |
| 301 | 8.567  | 5.4026 | 7.4003 | FCz | no     | 3 | 17 | Old-Low |
| 302 | 6.7533 | 3.5747 | 5.0101 | POz | no     | 3 | 17 | Old-Low |
| 303 | 7.9835 | 5.3475 | 8.1162 | FCz | weak   | 3 | 17 | Old-Low |
| 304 | 6.6229 | 3.4076 | 6.6162 | POz | weak   | 3 | 17 | Old-Low |
| 305 | 8.3381 | 4.881  | 6.3741 | FCz | strong | 3 | 17 | Old-Low |
| 306 | 6.4798 | 3.3095 | 4.9573 | POz | strong | 3 | 17 | Old-Low |
| 307 | 5.0099 | 3.9889 | 8.1085 | FCz | no     | 1 | 18 | Old-Low |
| 308 | 5.3826 | 7.1235 | 6.7143 | POz | no     | 1 | 18 | Old-Low |
| 309 | 5.3403 | 4.2668 | 8.752  | FCz | weak   | 1 | 18 | Old-Low |
| 310 | 5.4521 | 6.4427 | 7.791  | POz | weak   | 1 | 18 | Old-Low |
| 311 | 6.2349 | 4.4334 | 8.3736 | FCz | strong | 1 | 18 | Old-Low |

|     |        |        |        |     |        |   |    |         |
|-----|--------|--------|--------|-----|--------|---|----|---------|
| 312 | 7.083  | 7.9426 | 7.4418 | POz | strong | 1 | 18 | Old-Low |
| 313 | 5.8829 | 3.8295 | 7.4739 | FCz | no     | 2 | 18 | Old-Low |
| 314 | 5.49   | 5.9819 | 6.8579 | POz | no     | 2 | 18 | Old-Low |
| 315 | 5.1367 | 3.9743 | 7.8864 | FCz | weak   | 2 | 18 | Old-Low |
| 316 | 5.0164 | 6.3886 | 7.7656 | POz | weak   | 2 | 18 | Old-Low |
| 317 | 5.617  | 4.2449 | 7.7003 | FCz | strong | 2 | 18 | Old-Low |
| 318 | 6.2644 | 7.5455 | 7.538  | POz | strong | 2 | 18 | Old-Low |
| 319 | 6.4859 | 3.9962 | 8.5015 | FCz | no     | 3 | 18 | Old-Low |
| 320 | 5.9197 | 5.4575 | 8.3005 | POz | no     | 3 | 18 | Old-Low |
| 321 | 6.2302 | 4.0689 | 7.749  | FCz | weak   | 3 | 18 | Old-Low |
| 322 | 5.8534 | 5.9343 | 7.3571 | POz | weak   | 3 | 18 | Old-Low |
| 323 | 6.1739 | 4.2731 | 7.6999 | FCz | strong | 3 | 18 | Old-Low |
| 324 | 6.09   | 6.6187 | 7.6948 | POz | strong | 3 | 18 | Old-Low |
| 325 | 8.078  | 3.6965 | 7.4917 | FCz | no     | 1 | 19 | Old-Low |
| 326 | 10.629 | 4.9236 | 6.205  | POz | no     | 1 | 19 | Old-Low |
| 327 | 7.9457 | 3.9269 | 6.4785 | FCz | weak   | 1 | 19 | Old-Low |
| 328 | 10.28  | 4.6671 | 5.4736 | POz | weak   | 1 | 19 | Old-Low |
| 329 | 7.3817 | 3.8014 | 5.4396 | FCz | strong | 1 | 19 | Old-Low |
| 330 | 9.0372 | 5.3108 | 5.2285 | POz | strong | 1 | 19 | Old-Low |
| 331 | 9.527  | 4.2433 | 7.6972 | FCz | no     | 2 | 19 | Old-Low |
| 332 | 12.82  | 5.0163 | 6.1657 | POz | no     | 2 | 19 | Old-Low |
| 333 | 9.0412 | 4.2791 | 6.7427 | FCz | weak   | 2 | 19 | Old-Low |
| 334 | 12.154 | 5.4273 | 5.7396 | POz | weak   | 2 | 19 | Old-Low |
| 335 | 8.3109 | 3.9183 | 6.0293 | FCz | strong | 2 | 19 | Old-Low |
| 336 | 10.619 | 5.4751 | 5.0741 | POz | strong | 2 | 19 | Old-Low |
| 337 | 10.331 | 4.0034 | 7.4189 | FCz | no     | 3 | 19 | Old-Low |
| 338 | 13.984 | 5.1662 | 6.2692 | POz | no     | 3 | 19 | Old-Low |
| 339 | 10.069 | 3.9103 | 7.288  | FCz | weak   | 3 | 19 | Old-Low |
| 340 | 14.352 | 5.318  | 6.1814 | POz | weak   | 3 | 19 | Old-Low |
| 341 | 8.0943 | 3.5364 | 6.432  | FCz | strong | 3 | 19 | Old-Low |
| 342 | 10.637 | 4.8511 | 5.4543 | POz | strong | 3 | 19 | Old-Low |
| 343 | 42.364 | 22.284 | 21.057 | FCz | no     | 1 | 20 | Old-Low |
| 344 | 36.699 | 12.79  | 8.5774 | POz | no     | 1 | 20 | Old-Low |
| 345 | 34.486 | 20.751 | 19.369 | FCz | weak   | 1 | 20 | Old-Low |
| 346 | 27.912 | 11.041 | 7.7818 | POz | weak   | 1 | 20 | Old-Low |
| 347 | 32.938 | 21.929 | 18.566 | FCz | strong | 1 | 20 | Old-Low |
| 348 | 24.88  | 10.824 | 7.5069 | POz | strong | 1 | 20 | Old-Low |
| 349 | 46.575 | 22.007 | 22.092 | FCz | no     | 2 | 20 | Old-Low |
| 350 | 39.717 | 13.138 | 8.3466 | POz | no     | 2 | 20 | Old-Low |
| 351 | 42.069 | 22.49  | 20.963 | FCz | weak   | 2 | 20 | Old-Low |
| 352 | 35.913 | 13.477 | 8.2598 | POz | weak   | 2 | 20 | Old-Low |
| 353 | 36.511 | 22.164 | 18.955 | FCz | strong | 2 | 20 | Old-Low |
| 354 | 30.049 | 11.894 | 7.6841 | POz | strong | 2 | 20 | Old-Low |
| 355 | 55.249 | 25.443 | 22.849 | FCz | no     | 3 | 20 | Old-Low |
| 356 | 45.915 | 14.422 | 8.8971 | POz | no     | 3 | 20 | Old-Low |



|     |        |        |        |     |        |   |    |         |
|-----|--------|--------|--------|-----|--------|---|----|---------|
| 357 | 38.752 | 23.055 | 20.752 | FCz | weak   | 3 | 20 | Old-Low |
| 358 | 34.792 | 13.338 | 8.3834 | POz | weak   | 3 | 20 | Old-Low |
| 359 | 40.464 | 23.188 | 20.674 | FCz | strong | 3 | 20 | Old-Low |
| 360 | 30.431 | 12.069 | 7.6667 | POz | strong | 3 | 20 | Old-Low |
| 361 | 10.21  | 6.5936 | 9.3001 | FCz | no     | 1 | 21 | Old-Low |
| 362 | 8.004  | 3.7589 | 7.3092 | POz | no     | 1 | 21 | Old-Low |
| 363 | 9.7435 | 5.7328 | 9.663  | FCz | weak   | 1 | 21 | Old-Low |
| 364 | 8.0362 | 3.3687 | 7.4693 | POz | weak   | 1 | 21 | Old-Low |
| 365 | 9.7374 | 6.0882 | 9.0217 | FCz | strong | 1 | 21 | Old-Low |
| 366 | 8.042  | 3.4182 | 7.0167 | POz | strong | 1 | 21 | Old-Low |
| 367 | 12.167 | 6.3306 | 11.189 | FCz | no     | 2 | 21 | Old-Low |
| 368 | 9.0643 | 3.9635 | 8.0242 | POz | no     | 2 | 21 | Old-Low |
| 369 | 9.9749 | 6.0296 | 10.374 | FCz | weak   | 2 | 21 | Old-Low |
| 370 | 7.7098 | 3.5263 | 7.2056 | POz | weak   | 2 | 21 | Old-Low |
| 371 | 10.643 | 6.0598 | 9.3681 | FCz | strong | 2 | 21 | Old-Low |
| 372 | 8.5428 | 3.6542 | 6.9492 | POz | strong | 2 | 21 | Old-Low |
| 373 | 12.282 | 6.1224 | 10.691 | FCz | no     | 3 | 21 | Old-Low |
| 374 | 8.502  | 3.655  | 7.7387 | POz | no     | 3 | 21 | Old-Low |
| 375 | 10.612 | 6.1511 | 10.516 | FCz | weak   | 3 | 21 | Old-Low |
| 376 | 8.0773 | 3.4702 | 7.2914 | POz | weak   | 3 | 21 | Old-Low |
| 377 | 11.498 | 6.435  | 10.265 | FCz | strong | 3 | 21 | Old-Low |
| 378 | 8.4203 | 3.4478 | 7.447  | POz | strong | 3 | 21 | Old-Low |
| 379 | 10.403 | 8.2354 | 14.565 | FCz | no     | 1 | 22 | Old-Low |
| 380 | 10.566 | 7.3458 | 19.417 | POz | no     | 1 | 22 | Old-Low |
| 381 | 9.4082 | 8.3089 | 13.777 | FCz | weak   | 1 | 22 | Old-Low |
| 382 | 10.434 | 6.72   | 17.871 | POz | weak   | 1 | 22 | Old-Low |
| 383 | 9.9615 | 8.7089 | 14.995 | FCz | strong | 1 | 22 | Old-Low |
| 384 | 10.24  | 6.8233 | 20.39  | POz | strong | 1 | 22 | Old-Low |
| 385 | 11.186 | 8.6396 | 12.86  | FCz | no     | 2 | 22 | Old-Low |
| 386 | 10.678 | 8.1453 | 14.825 | POz | no     | 2 | 22 | Old-Low |
| 387 | 10.376 | 9.0307 | 12.159 | FCz | weak   | 2 | 22 | Old-Low |
| 388 | 11.08  | 7.3871 | 14.254 | POz | weak   | 2 | 22 | Old-Low |
| 389 | 10.521 | 8.2933 | 13.215 | FCz | strong | 2 | 22 | Old-Low |
| 390 | 11.172 | 6.7827 | 16.63  | POz | strong | 2 | 22 | Old-Low |
| 391 | 11.545 | 8.723  | 18.263 | FCz | no     | 3 | 22 | Old-Low |
| 392 | 13.017 | 8.7344 | 21.46  | POz | no     | 3 | 22 | Old-Low |
| 393 | 11.985 | 9.302  | 15.444 | FCz | weak   | 3 | 22 | Old-Low |
| 394 | 12.201 | 8.7508 | 18.333 | POz | weak   | 3 | 22 | Old-Low |
| 395 | 11.605 | 8.9737 | 17.821 | FCz | strong | 3 | 22 | Old-Low |
| 396 | 12.439 | 7.861  | 21.012 | POz | strong | 3 | 22 | Old-Low |
| 397 | 11.593 | 4.024  | 20.241 | FCz | no     | 1 | 23 | Old-Low |
| 398 | 12.103 | 2.7736 | 22.152 | POz | no     | 1 | 23 | Old-Low |
| 399 | 10.285 | 4.0893 | 20.586 | FCz | weak   | 1 | 23 | Old-Low |
| 400 | 12.129 | 2.8962 | 23.146 | POz | weak   | 1 | 23 | Old-Low |
| 401 | 11.998 | 4.3032 | 22.332 | FCz | strong | 1 | 23 | Old-Low |

|     |        |        |        |     |        |   |    |         |
|-----|--------|--------|--------|-----|--------|---|----|---------|
| 402 | 14.048 | 3.5303 | 26.146 | POz | strong | 1 | 23 | Old-Low |
| 403 | 10.363 | 3.8388 | 21.596 | FCz | no     | 2 | 23 | Old-Low |
| 404 | 11.625 | 2.5609 | 21.665 | POz | no     | 2 | 23 | Old-Low |
| 405 | 9.1953 | 3.7816 | 18.501 | FCz | weak   | 2 | 23 | Old-Low |
| 406 | 10.621 | 2.6444 | 20.348 | POz | weak   | 2 | 23 | Old-Low |
| 407 | 9.0333 | 4.1011 | 18.854 | FCz | strong | 2 | 23 | Old-Low |
| 408 | 10.722 | 2.9297 | 21.736 | POz | strong | 2 | 23 | Old-Low |
| 409 | 8.1546 | 3.5637 | 16.904 | FCz | no     | 3 | 23 | Old-Low |
| 410 | 7.8916 | 2.3515 | 15.056 | POz | no     | 3 | 23 | Old-Low |
| 411 | 8.6501 | 3.8023 | 16.696 | FCz | weak   | 3 | 23 | Old-Low |
| 412 | 8.0105 | 2.3599 | 16.591 | POz | weak   | 3 | 23 | Old-Low |
| 413 | 7.8002 | 3.8812 | 14.145 | FCz | strong | 3 | 23 | Old-Low |
| 414 | 7.7621 | 2.4143 | 14.097 | POz | strong | 3 | 23 | Old-Low |
| 415 | 4.6816 | 3.4887 | 6.1157 | FCz | no     | 1 | 24 | Old-Low |
| 416 | 2.4239 | 1.4429 | 4.4285 | POz | no     | 1 | 24 | Old-Low |
| 417 | 4.0507 | 3.0837 | 6.9773 | FCz | weak   | 1 | 24 | Old-Low |
| 418 | 2.0951 | 1.3136 | 5.1159 | POz | weak   | 1 | 24 | Old-Low |
| 419 | 3.9572 | 3.174  | 7.4803 | FCz | strong | 1 | 24 | Old-Low |
| 420 | 2.2948 | 1.3389 | 5.7238 | POz | strong | 1 | 24 | Old-Low |
| 421 | 4.9618 | 3.3336 | 6.7737 | FCz | no     | 2 | 24 | Old-Low |
| 422 | 2.4516 | 1.3524 | 4.3756 | POz | no     | 2 | 24 | Old-Low |
| 423 | 4.5814 | 3.1807 | 7.1199 | FCz | weak   | 2 | 24 | Old-Low |
| 424 | 2.445  | 1.3099 | 5.2647 | POz | weak   | 2 | 24 | Old-Low |
| 425 | 4.3062 | 3.1707 | 5.9873 | FCz | strong | 2 | 24 | Old-Low |
| 426 | 2.0609 | 1.359  | 4.1184 | POz | strong | 2 | 24 | Old-Low |
| 427 | 5.5254 | 3.1995 | 7.9323 | FCz | no     | 3 | 24 | Old-Low |
| 428 | 2.8725 | 1.4442 | 5.8844 | POz | no     | 3 | 24 | Old-Low |
| 429 | 6.0639 | 3.1579 | 6.297  | FCz | weak   | 3 | 24 | Old-Low |
| 430 | 2.9975 | 1.3208 | 4.4916 | POz | weak   | 3 | 24 | Old-Low |
| 431 | 5.4174 | 3.2216 | 6.8835 | FCz | strong | 3 | 24 | Old-Low |
| 432 | 2.6437 | 1.3925 | 4.8886 | POz | strong | 3 | 24 | Old-Low |
| 433 | 19.541 | 11.211 | 30.662 | FCz | no     | 1 | 25 | Old-Low |
| 434 | 17.354 | 10.418 | 22.327 | POz | no     | 1 | 25 | Old-Low |
| 435 | 20.762 | 10.972 | 26     | FCz | weak   | 1 | 25 | Old-Low |
| 436 | 17.845 | 9.5806 | 20.155 | POz | weak   | 1 | 25 | Old-Low |
| 437 | 20.666 | 10.822 | 25.853 | FCz | strong | 1 | 25 | Old-Low |
| 438 | 18.053 | 10.308 | 21.405 | POz | strong | 1 | 25 | Old-Low |
| 439 | 26.599 | 12.287 | 33.977 | FCz | no     | 2 | 25 | Old-Low |
| 440 | 20.804 | 10.852 | 25.043 | POz | no     | 2 | 25 | Old-Low |
| 441 | 23.791 | 12.12  | 30.933 | FCz | weak   | 2 | 25 | Old-Low |
| 442 | 19.141 | 10.514 | 22.47  | POz | weak   | 2 | 25 | Old-Low |
| 443 | 24.694 | 11.131 | 31.963 | FCz | strong | 2 | 25 | Old-Low |
| 444 | 20.04  | 10.094 | 26.96  | POz | strong | 2 | 25 | Old-Low |
| 445 | 29.871 | 15.292 | 30.314 | FCz | no     | 3 | 25 | Old-Low |
| 446 | 20.099 | 11.832 | 19.687 | POz | no     | 3 | 25 | Old-Low |

|     |        |        |        |     |        |   |    |         |
|-----|--------|--------|--------|-----|--------|---|----|---------|
| 447 | 24.252 | 11.954 | 33.518 | FCz | weak   | 3 | 25 | Old-Low |
| 448 | 19.226 | 9.8332 | 24.075 | POz | weak   | 3 | 25 | Old-Low |
| 449 | 23.441 | 12.383 | 32.243 | FCz | strong | 3 | 25 | Old-Low |
| 450 | 19.197 | 10.127 | 24.601 | POz | strong | 3 | 25 | Old-Low |
| 451 | 11.913 | 8.5076 | 19.238 | FCz | no     | 1 | 26 | Old-Low |
| 452 | 14.802 | 11.533 | 26.243 | POz | no     | 1 | 26 | Old-Low |
| 453 | 12.353 | 9.1526 | 20.01  | FCz | weak   | 1 | 26 | Old-Low |
| 454 | 15.558 | 13.951 | 27.751 | POz | weak   | 1 | 26 | Old-Low |
| 455 | 13.421 | 10.501 | 23.177 | FCz | strong | 1 | 26 | Old-Low |
| 456 | 17.856 | 15.955 | 31.429 | POz | strong | 1 | 26 | Old-Low |
| 457 | 8.6529 | 7.1848 | 9.8194 | FCz | no     | 2 | 26 | Old-Low |
| 458 | 10.818 | 10.36  | 13.599 | POz | no     | 2 | 26 | Old-Low |
| 459 | 8.1593 | 7.8423 | 9.3497 | FCz | weak   | 2 | 26 | Old-Low |
| 460 | 11.238 | 11.139 | 13.493 | POz | weak   | 2 | 26 | Old-Low |
| 461 | 9.0134 | 8.2062 | 11.971 | FCz | strong | 2 | 26 | Old-Low |
| 462 | 11.966 | 11.646 | 16.627 | POz | strong | 2 | 26 | Old-Low |
| 463 | 7.5771 | 6.6277 | 5.7923 | FCz | no     | 3 | 26 | Old-Low |
| 464 | 9.6004 | 10.653 | 8.5359 | POz | no     | 3 | 26 | Old-Low |
| 465 | 8.0453 | 6.3995 | 7.2842 | FCz | weak   | 3 | 26 | Old-Low |
| 466 | 10.345 | 10.746 | 9.8121 | POz | weak   | 3 | 26 | Old-Low |
| 467 | 8.0961 | 6.8232 | 6.7137 | FCz | strong | 3 | 26 | Old-Low |
| 468 | 10.144 | 11.571 | 9.4444 | POz | strong | 3 | 26 | Old-Low |
| 469 | 11.179 | 8.755  | 9.4691 | FCz | no     | 1 | 27 | Old-Low |
| 470 | 16.167 | 11.383 | 10.151 | POz | no     | 1 | 27 | Old-Low |
| 471 | 14.102 | 8.2753 | 9.9829 | FCz | weak   | 1 | 27 | Old-Low |
| 472 | 17.681 | 11.799 | 10.391 | POz | weak   | 1 | 27 | Old-Low |
| 473 | 12.808 | 9.0621 | 9.4399 | FCz | strong | 1 | 27 | Old-Low |
| 474 | 16.989 | 10.569 | 9.7417 | POz | strong | 1 | 27 | Old-Low |
| 475 | 13.1   | 9.5962 | 9.202  | FCz | no     | 2 | 27 | Old-Low |
| 476 | 16.064 | 12.63  | 10.186 | POz | no     | 2 | 27 | Old-Low |
| 477 | 14.354 | 9.5076 | 9.2807 | FCz | weak   | 2 | 27 | Old-Low |
| 478 | 19.259 | 11.986 | 10.764 | POz | weak   | 2 | 27 | Old-Low |
| 479 | 12.59  | 9.3393 | 8.5996 | FCz | strong | 2 | 27 | Old-Low |
| 480 | 17.482 | 10.503 | 9.3703 | POz | strong | 2 | 27 | Old-Low |
| 481 | 14.313 | 9.0993 | 8.9108 | FCz | no     | 3 | 27 | Old-Low |
| 482 | 18.325 | 12.526 | 9.6079 | POz | no     | 3 | 27 | Old-Low |
| 483 | 11.977 | 9.1144 | 8.0862 | FCz | weak   | 3 | 27 | Old-Low |
| 484 | 15.445 | 10.948 | 9.4906 | POz | weak   | 3 | 27 | Old-Low |
| 485 | 12.748 | 9.7121 | 8.6967 | FCz | strong | 3 | 27 | Old-Low |
| 486 | 17.009 | 10.656 | 9.3968 | POz | strong | 3 | 27 | Old-Low |
| 487 | 18.065 | 11.228 | 9.8673 | FCz | no     | 1 | 28 | Old-Low |
| 488 | 16.853 | 12.27  | 12.046 | POz | no     | 1 | 28 | Old-Low |
| 489 | 16.849 | 12.406 | 9.4711 | FCz | weak   | 1 | 28 | Old-Low |
| 490 | 16.128 | 13.613 | 11.483 | POz | weak   | 1 | 28 | Old-Low |
| 491 | 15.732 | 11.541 | 9.95   | FCz | strong | 1 | 28 | Old-Low |

|     |        |        |        |     |        |   |    |          |
|-----|--------|--------|--------|-----|--------|---|----|----------|
| 492 | 14.429 | 11.563 | 11.201 | POz | strong | 1 | 28 | Old-Low  |
| 493 | 19.629 | 10.604 | 9.0143 | FCz | no     | 2 | 28 | Old-Low  |
| 494 | 18.114 | 12.849 | 10.932 | POz | no     | 2 | 28 | Old-Low  |
| 495 | 15.232 | 10.955 | 8.5225 | FCz | weak   | 2 | 28 | Old-Low  |
| 496 | 16.108 | 12.462 | 10.498 | POz | weak   | 2 | 28 | Old-Low  |
| 497 | 16.531 | 11.764 | 8.6893 | FCz | strong | 2 | 28 | Old-Low  |
| 498 | 15.575 | 12.383 | 10.175 | POz | strong | 2 | 28 | Old-Low  |
| 499 | 18.006 | 11.791 | 9.1955 | FCz | no     | 3 | 28 | Old-Low  |
| 500 | 16.351 | 12.59  | 10.666 | POz | no     | 3 | 28 | Old-Low  |
| 501 | 17.529 | 11.427 | 8.8875 | FCz | weak   | 3 | 28 | Old-Low  |
| 502 | 15.967 | 12.366 | 9.926  | POz | weak   | 3 | 28 | Old-Low  |
| 503 | 17.561 | 11.801 | 8.6913 | FCz | strong | 3 | 28 | Old-Low  |
| 504 | 16.226 | 13.544 | 10.007 | POz | strong | 3 | 28 | Old-Low  |
| 505 | 11.689 | 8.8414 | 14.891 | FCz | no     | 1 | 29 | Old-High |
| 506 | 16.31  | 8.7832 | 13.722 | POz | no     | 1 | 29 | Old-High |
| 507 | 9.1993 | 7.4176 | 12.927 | FCz | weak   | 1 | 29 | Old-High |
| 508 | 12.887 | 7.2013 | 13.748 | POz | weak   | 1 | 29 | Old-High |
| 509 | 8.0515 | 7.2212 | 11.279 | FCz | strong | 1 | 29 | Old-High |
| 510 | 11.209 | 7.0831 | 12.436 | POz | strong | 1 | 29 | Old-High |
| 511 | 13.101 | 7.8698 | 13.526 | FCz | no     | 2 | 29 | Old-High |
| 512 | 16.771 | 7.3625 | 11.223 | POz | no     | 2 | 29 | Old-High |
| 513 | 14.561 | 8.9511 | 12.626 | FCz | weak   | 2 | 29 | Old-High |
| 514 | 15.733 | 8.1637 | 10.828 | POz | weak   | 2 | 29 | Old-High |
| 515 | 13.604 | 7.3583 | 12.963 | FCz | strong | 2 | 29 | Old-High |
| 516 | 18.032 | 8.3435 | 11.916 | POz | strong | 2 | 29 | Old-High |
| 517 | 19.953 | 10.206 | 14.303 | FCz | no     | 3 | 29 | Old-High |
| 518 | 22.558 | 9.0939 | 10.969 | POz | no     | 3 | 29 | Old-High |
| 519 | 14.125 | 8.1351 | 14.669 | FCz | weak   | 3 | 29 | Old-High |
| 520 | 17.528 | 9.9012 | 9.2992 | POz | weak   | 3 | 29 | Old-High |
| 521 | 17.017 | 8.6746 | 12.644 | FCz | strong | 3 | 29 | Old-High |
| 522 | 20.262 | 8.613  | 9.3723 | POz | strong | 3 | 29 | Old-High |
| 523 | 6.13   | 5.2079 | 14.069 | FCz | no     | 1 | 30 | Old-High |
| 524 | 5.64   | 4.0952 | 12.979 | POz | no     | 1 | 30 | Old-High |
| 525 | 5.5286 | 5.5898 | 9.45   | FCz | weak   | 1 | 30 | Old-High |
| 526 | 4.6767 | 4.0124 | 8.7868 | POz | weak   | 1 | 30 | Old-High |
| 527 | 5.104  | 5.1948 | 10.849 | FCz | strong | 1 | 30 | Old-High |
| 528 | 4.9538 | 4.1244 | 11.347 | POz | strong | 1 | 30 | Old-High |
| 529 | 6.4194 | 5.8852 | 12.377 | FCz | no     | 2 | 30 | Old-High |
| 530 | 6.1148 | 4.3005 | 11.081 | POz | no     | 2 | 30 | Old-High |
| 531 | 5.6901 | 5.5635 | 11.92  | FCz | weak   | 2 | 30 | Old-High |
| 532 | 5.2046 | 3.8015 | 10.86  | POz | weak   | 2 | 30 | Old-High |
| 533 | 5.5563 | 5.212  | 9.6021 | FCz | strong | 2 | 30 | Old-High |
| 534 | 5.067  | 3.6699 | 10.225 | POz | strong | 2 | 30 | Old-High |
| 535 | 6.2418 | 5.2752 | 11.903 | FCz | no     | 3 | 30 | Old-High |
| 536 | 5.7061 | 3.9978 | 9.8321 | POz | no     | 3 | 30 | Old-High |

|     |        |        |        |     |        |   |    |          |
|-----|--------|--------|--------|-----|--------|---|----|----------|
| 537 | 6.2946 | 5.5348 | 14.481 | FCz | weak   | 3 | 30 | Old-High |
| 538 | 5.7197 | 3.9834 | 12.748 | POz | weak   | 3 | 30 | Old-High |
| 539 | 6.0992 | 5.4393 | 14.395 | FCz | strong | 3 | 30 | Old-High |
| 540 | 5.8796 | 3.7777 | 12.582 | POz | strong | 3 | 30 | Old-High |
| 541 | 43.846 | 13.417 | 27.393 | FCz | no     | 1 | 31 | Old-High |
| 542 | 31.696 | 10.738 | 21.323 | POz | no     | 1 | 31 | Old-High |
| 543 | 44.025 | 13.744 | 28.632 | FCz | weak   | 1 | 31 | Old-High |
| 544 | 28.908 | 10.696 | 22.114 | POz | weak   | 1 | 31 | Old-High |
| 545 | 36.753 | 13.131 | 24.057 | FCz | strong | 1 | 31 | Old-High |
| 546 | 25.405 | 9.407  | 19.971 | POz | strong | 1 | 31 | Old-High |
| 547 | 55.881 | 14.943 | 31.583 | FCz | no     | 2 | 31 | Old-High |
| 548 | 39.491 | 11.313 | 25.558 | POz | no     | 2 | 31 | Old-High |
| 549 | 50.956 | 15.029 | 31.327 | FCz | weak   | 2 | 31 | Old-High |
| 550 | 36.487 | 12.228 | 24.269 | POz | weak   | 2 | 31 | Old-High |
| 551 | 53.962 | 15.646 | 25.868 | FCz | strong | 2 | 31 | Old-High |
| 552 | 36.663 | 12.111 | 19.507 | POz | strong | 2 | 31 | Old-High |
| 553 | 55.714 | 15.739 | 30.198 | FCz | no     | 3 | 31 | Old-High |
| 554 | 38.596 | 11.702 | 21.91  | POz | no     | 3 | 31 | Old-High |
| 555 | 52.76  | 15.721 | 26.885 | FCz | weak   | 3 | 31 | Old-High |
| 556 | 36.511 | 11.528 | 19.62  | POz | weak   | 3 | 31 | Old-High |
| 557 | 48.029 | 14.831 | 25.369 | FCz | strong | 3 | 31 | Old-High |
| 558 | 34.697 | 11.556 | 20.042 | POz | strong | 3 | 31 | Old-High |
| 559 | 20.917 | 9.8357 | 23.688 | FCz | no     | 1 | 32 | Old-High |
| 560 | 20.669 | 15.417 | 15.662 | POz | no     | 1 | 32 | Old-High |
| 561 | 18.888 | 10.232 | 21.47  | FCz | weak   | 1 | 32 | Old-High |
| 562 | 20.492 | 15.381 | 15.263 | POz | weak   | 1 | 32 | Old-High |
| 563 | 18.805 | 10.202 | 20.128 | FCz | strong | 1 | 32 | Old-High |
| 564 | 18.777 | 12.275 | 14.504 | POz | strong | 1 | 32 | Old-High |
| 565 | 25.338 | 10.751 | 27.743 | FCz | no     | 2 | 32 | Old-High |
| 566 | 23.523 | 17.665 | 15.28  | POz | no     | 2 | 32 | Old-High |
| 567 | 23.522 | 10.598 | 24.484 | FCz | weak   | 2 | 32 | Old-High |
| 568 | 21.298 | 14.016 | 13.573 | POz | weak   | 2 | 32 | Old-High |
| 569 | 21.765 | 9.7223 | 20.302 | FCz | strong | 2 | 32 | Old-High |
| 570 | 19.286 | 14.101 | 12.046 | POz | strong | 2 | 32 | Old-High |
| 571 | 22.648 | 10.206 | 26.429 | FCz | no     | 3 | 32 | Old-High |
| 572 | 24.275 | 15.761 | 15.896 | POz | no     | 3 | 32 | Old-High |
| 573 | 23.905 | 10.467 | 24.62  | FCz | weak   | 3 | 32 | Old-High |
| 574 | 21.41  | 13.178 | 14.034 | POz | weak   | 3 | 32 | Old-High |
| 575 | 22.451 | 9.4443 | 22.764 | FCz | strong | 3 | 32 | Old-High |
| 576 | 21.941 | 12.705 | 13.061 | POz | strong | 3 | 32 | Old-High |
| 577 | 8.068  | 13.562 | 8.2821 | FCz | no     | 1 | 33 | Old-High |
| 578 | 6.3005 | 6.8051 | 6.855  | POz | no     | 1 | 33 | Old-High |
| 579 | 7.5985 | 13.302 | 7.4876 | FCz | weak   | 1 | 33 | Old-High |
| 580 | 6.6657 | 7.5437 | 6.0915 | POz | weak   | 1 | 33 | Old-High |
| 581 | 7.0491 | 14.171 | 7.5183 | FCz | strong | 1 | 33 | Old-High |

|     |        |        |        |     |        |   |    |          |
|-----|--------|--------|--------|-----|--------|---|----|----------|
| 582 | 6.0611 | 7.0695 | 6.9356 | POz | strong | 1 | 33 | Old-High |
| 583 | 8.5697 | 13.428 | 8.2415 | FCz | no     | 2 | 33 | Old-High |
| 584 | 7.2181 | 8.6241 | 6.3274 | POz | no     | 2 | 33 | Old-High |
| 585 | 8.5513 | 12.666 | 7.4047 | FCz | weak   | 2 | 33 | Old-High |
| 586 | 6.9599 | 7.7962 | 5.6378 | POz | weak   | 2 | 33 | Old-High |
| 587 | 7.6475 | 12.469 | 7.1649 | FCz | strong | 2 | 33 | Old-High |
| 588 | 6.5226 | 7.8199 | 6.1418 | POz | strong | 2 | 33 | Old-High |
| 589 | 9.3681 | 12.992 | 7.4215 | FCz | no     | 3 | 33 | Old-High |
| 590 | 7.8928 | 8.1303 | 5.2198 | POz | no     | 3 | 33 | Old-High |
| 591 | 8.6455 | 13.86  | 6.7969 | FCz | weak   | 3 | 33 | Old-High |
| 592 | 7.0941 | 8.9218 | 4.7444 | POz | weak   | 3 | 33 | Old-High |
| 593 | 7.4961 | 12.349 | 5.5972 | FCz | strong | 3 | 33 | Old-High |
| 594 | 6.0197 | 8.2414 | 4.4003 | POz | strong | 3 | 33 | Old-High |
| 595 | 87.465 | 31.023 | 25.239 | FCz | no     | 1 | 34 | Old-High |
| 596 | 59.373 | 20.766 | 16.634 | POz | no     | 1 | 34 | Old-High |
| 597 | 88.713 | 32.801 | 25.357 | FCz | weak   | 1 | 34 | Old-High |
| 598 | 57.345 | 24.311 | 16.526 | POz | weak   | 1 | 34 | Old-High |
| 599 | 79.442 | 29.201 | 23.133 | FCz | strong | 1 | 34 | Old-High |
| 600 | 54.734 | 20.867 | 16.15  | POz | strong | 1 | 34 | Old-High |
| 601 | 96.631 | 32.489 | 26.877 | FCz | no     | 2 | 34 | Old-High |
| 602 | 65.026 | 22.592 | 18.109 | POz | no     | 2 | 34 | Old-High |
| 603 | 108.24 | 27.784 | 24.766 | FCz | weak   | 2 | 34 | Old-High |
| 604 | 69.173 | 18.19  | 17.268 | POz | weak   | 2 | 34 | Old-High |
| 605 | 98.207 | 28.577 | 24.038 | FCz | strong | 2 | 34 | Old-High |
| 606 | 64.871 | 20.789 | 15.912 | POz | strong | 2 | 34 | Old-High |
| 607 | 112.59 | 33.388 | 29.779 | FCz | no     | 3 | 34 | Old-High |
| 608 | 71.996 | 24.075 | 20.667 | POz | no     | 3 | 34 | Old-High |
| 609 | 112.72 | 32.064 | 27.803 | FCz | weak   | 3 | 34 | Old-High |
| 610 | 71.707 | 23.195 | 19.382 | POz | weak   | 3 | 34 | Old-High |
| 611 | 104.53 | 31.035 | 24.768 | FCz | strong | 3 | 34 | Old-High |
| 612 | 68.02  | 20.785 | 17.462 | POz | strong | 3 | 34 | Old-High |
| 613 | 103.83 | 31.772 | 38.976 | FCz | no     | 1 | 35 | Old-High |
| 614 | 120.06 | 30.023 | 52.636 | POz | no     | 1 | 35 | Old-High |
| 615 | 93.869 | 33.699 | 37.792 | FCz | weak   | 1 | 35 | Old-High |
| 616 | 103.9  | 29.299 | 51.128 | POz | weak   | 1 | 35 | Old-High |
| 617 | 91.55  | 29.06  | 34.993 | FCz | strong | 1 | 35 | Old-High |
| 618 | 88.81  | 24.105 | 48.692 | POz | strong | 1 | 35 | Old-High |
| 619 | 103.81 | 31.595 | 30.228 | FCz | no     | 2 | 35 | Old-High |
| 620 | 161.96 | 34.577 | 38.237 | POz | no     | 2 | 35 | Old-High |
| 621 | 103.16 | 31.114 | 27.917 | FCz | weak   | 2 | 35 | Old-High |
| 622 | 115.25 | 34.089 | 36.264 | POz | weak   | 2 | 35 | Old-High |
| 623 | 80.866 | 30.696 | 24.272 | FCz | strong | 2 | 35 | Old-High |
| 624 | 91.371 | 28.314 | 34.522 | POz | strong | 2 | 35 | Old-High |
| 625 | 102.4  | 34.098 | 29.911 | FCz | no     | 3 | 35 | Old-High |
| 626 | 122.13 | 42.77  | 40.261 | POz | no     | 3 | 35 | Old-High |

|     |        |        |        |     |        |   |    |          |
|-----|--------|--------|--------|-----|--------|---|----|----------|
| 627 | 87.241 | 30.453 | 25.067 | FCz | weak   | 3 | 35 | Old-High |
| 628 | 103.64 | 37.342 | 36.997 | POz | weak   | 3 | 35 | Old-High |
| 629 | 97.095 | 27.768 | 23.939 | FCz | strong | 3 | 35 | Old-High |
| 630 | 95.475 | 31.538 | 37.622 | POz | strong | 3 | 35 | Old-High |
| 631 | 32.683 | 17.297 | 24.441 | FCz | no     | 1 | 36 | Old-High |
| 632 | 41.665 | 34.806 | 24.454 | POz | no     | 1 | 36 | Old-High |
| 633 | 34     | 16.674 | 25.305 | FCz | weak   | 1 | 36 | Old-High |
| 634 | 41.388 | 35.33  | 24.665 | POz | weak   | 1 | 36 | Old-High |
| 635 | 33.59  | 16.637 | 22.793 | FCz | strong | 1 | 36 | Old-High |
| 636 | 43.522 | 32.173 | 20.553 | POz | strong | 1 | 36 | Old-High |
| 637 | 41.146 | 19.618 | 28.25  | FCz | no     | 2 | 36 | Old-High |
| 638 | 43.62  | 35.386 | 26.016 | POz | no     | 2 | 36 | Old-High |
| 639 | 42.665 | 19.735 | 31.515 | FCz | weak   | 2 | 36 | Old-High |
| 640 | 46.379 | 36.393 | 26.871 | POz | weak   | 2 | 36 | Old-High |
| 641 | 35.683 | 17.82  | 25.152 | FCz | strong | 2 | 36 | Old-High |
| 642 | 46.247 | 32.769 | 22.959 | POz | strong | 2 | 36 | Old-High |
| 643 | 52.32  | 19.009 | 32.527 | FCz | no     | 3 | 36 | Old-High |
| 644 | 52.269 | 32.102 | 29.28  | POz | no     | 3 | 36 | Old-High |
| 645 | 45.889 | 21.653 | 31.676 | FCz | weak   | 3 | 36 | Old-High |
| 646 | 50.594 | 33.764 | 28.675 | POz | weak   | 3 | 36 | Old-High |
| 647 | 46.587 | 17.777 | 28.39  | FCz | strong | 3 | 36 | Old-High |
| 648 | 49.321 | 32.732 | 25.754 | POz | strong | 3 | 36 | Old-High |
| 649 | 5.8017 | 7.3303 | 8.1887 | FCz | no     | 1 | 37 | Old-High |
| 650 | 8.1305 | 10.019 | 6.0763 | POz | no     | 1 | 37 | Old-High |
| 651 | 5.882  | 7.7143 | 8.0141 | FCz | weak   | 1 | 37 | Old-High |
| 652 | 8.2857 | 9.6271 | 6.1071 | POz | weak   | 1 | 37 | Old-High |
| 653 | 5.8656 | 7.9666 | 7.6345 | FCz | strong | 1 | 37 | Old-High |
| 654 | 8.3004 | 9.5905 | 5.4916 | POz | strong | 1 | 37 | Old-High |
| 655 | 5.4434 | 7.7631 | 8.1615 | FCz | no     | 2 | 37 | Old-High |
| 656 | 7.8188 | 9.6919 | 5.9717 | POz | no     | 2 | 37 | Old-High |
| 657 | 5.3039 | 7.05   | 7.4974 | FCz | weak   | 2 | 37 | Old-High |
| 658 | 8.0407 | 9.2922 | 5.9822 | POz | weak   | 2 | 37 | Old-High |
| 659 | 5.4433 | 6.8219 | 7.4162 | FCz | strong | 2 | 37 | Old-High |
| 660 | 7.7272 | 9.629  | 5.8565 | POz | strong | 2 | 37 | Old-High |
| 661 | 5.6396 | 7.8147 | 8.358  | FCz | no     | 3 | 37 | Old-High |
| 662 | 7.2025 | 8.1692 | 6.3353 | POz | no     | 3 | 37 | Old-High |
| 663 | 5.5139 | 7.2128 | 8.3285 | FCz | weak   | 3 | 37 | Old-High |
| 664 | 7.0082 | 8.7691 | 6.0745 | POz | weak   | 3 | 37 | Old-High |
| 665 | 5.559  | 7.1851 | 8.0996 | FCz | strong | 3 | 37 | Old-High |
| 666 | 7.3301 | 9.109  | 5.8525 | POz | strong | 3 | 37 | Old-High |
| 667 | 11.889 | 8.8054 | 8.7898 | FCz | no     | 1 | 38 | Old-High |
| 668 | 29.803 | 26.812 | 14.163 | POz | no     | 1 | 38 | Old-High |
| 669 | 12.143 | 9.2085 | 8.6003 | FCz | weak   | 1 | 38 | Old-High |
| 670 | 30.902 | 26.943 | 14.218 | POz | weak   | 1 | 38 | Old-High |
| 671 | 11.743 | 8.8376 | 9.3901 | FCz | strong | 1 | 38 | Old-High |

|     |        |        |        |     |        |   |    |          |
|-----|--------|--------|--------|-----|--------|---|----|----------|
| 672 | 29.253 | 27.757 | 14.782 | POz | strong | 1 | 38 | Old-High |
| 673 | 11.9   | 9.3124 | 7.46   | FCz | no     | 2 | 38 | Old-High |
| 674 | 29.885 | 26.727 | 12.121 | POz | no     | 2 | 38 | Old-High |
| 675 | 11.717 | 9.305  | 8.1513 | FCz | weak   | 2 | 38 | Old-High |
| 676 | 27.597 | 26.615 | 12.22  | POz | weak   | 2 | 38 | Old-High |
| 677 | 12.383 | 8.6302 | 7.9605 | FCz | strong | 2 | 38 | Old-High |
| 678 | 28.091 | 25.06  | 12.26  | POz | strong | 2 | 38 | Old-High |
| 679 | 12.408 | 9.7699 | 7.2512 | FCz | no     | 3 | 38 | Old-High |
| 680 | 30.657 | 25.818 | 11.513 | POz | no     | 3 | 38 | Old-High |
| 681 | 12.131 | 9.1941 | 7.0597 | FCz | weak   | 3 | 38 | Old-High |
| 682 | 34.333 | 28.459 | 11.691 | POz | weak   | 3 | 38 | Old-High |
| 683 | 12.278 | 8.7031 | 7.7101 | FCz | strong | 3 | 38 | Old-High |
| 684 | 33.122 | 27.471 | 11.902 | POz | strong | 3 | 38 | Old-High |
| 685 | 7.9389 | 8.4914 | 12.602 | FCz | no     | 1 | 39 | Old-High |
| 686 | 10.217 | 13.847 | 16.167 | POz | no     | 1 | 39 | Old-High |
| 687 | 8.2762 | 8.1827 | 12.199 | FCz | weak   | 1 | 39 | Old-High |
| 688 | 11.678 | 15.399 | 15.735 | POz | weak   | 1 | 39 | Old-High |
| 689 | 8.8269 | 9.2573 | 12.793 | FCz | strong | 1 | 39 | Old-High |
| 690 | 10.445 | 12.955 | 17.804 | POz | strong | 1 | 39 | Old-High |
| 691 | 7.7082 | 7.5593 | 12.139 | FCz | no     | 2 | 39 | Old-High |
| 692 | 8.8118 | 10.289 | 14.098 | POz | no     | 2 | 39 | Old-High |
| 693 | 7.7029 | 8.7595 | 12.507 | FCz | weak   | 2 | 39 | Old-High |
| 694 | 9.2803 | 9.9839 | 16.212 | POz | weak   | 2 | 39 | Old-High |
| 695 | 8.3158 | 9.2099 | 13.222 | FCz | strong | 2 | 39 | Old-High |
| 696 | 9.7444 | 11.735 | 17.525 | POz | strong | 2 | 39 | Old-High |
| 697 | 7.2007 | 7.9531 | 12.113 | FCz | no     | 3 | 39 | Old-High |
| 698 | 8.6015 | 8.8311 | 14.915 | POz | no     | 3 | 39 | Old-High |
| 699 | 7.9344 | 7.8895 | 11.19  | FCz | weak   | 3 | 39 | Old-High |
| 700 | 8.4603 | 9.7193 | 13.574 | POz | weak   | 3 | 39 | Old-High |
| 701 | 7.8334 | 8.149  | 11.164 | FCz | strong | 3 | 39 | Old-High |
| 702 | 9.3769 | 9.6995 | 15.362 | POz | strong | 3 | 39 | Old-High |
| 703 | 9.4715 | 5.6816 | 9.6297 | FCz | no     | 1 | 40 | Old-High |
| 704 | 8.1792 | 3.7126 | 9.0042 | POz | no     | 1 | 40 | Old-High |
| 705 | 9.4896 | 5.6464 | 9.8218 | FCz | weak   | 1 | 40 | Old-High |
| 706 | 8.8004 | 3.8464 | 8.8196 | POz | weak   | 1 | 40 | Old-High |
| 707 | 8.6158 | 6.3032 | 9.0433 | FCz | strong | 1 | 40 | Old-High |
| 708 | 7.5694 | 4.1943 | 8.6745 | POz | strong | 1 | 40 | Old-High |
| 709 | 12.209 | 5.7839 | 10.787 | FCz | no     | 2 | 40 | Old-High |
| 710 | 12.095 | 4.282  | 9.8547 | POz | no     | 2 | 40 | Old-High |
| 711 | 12.071 | 6.1147 | 10.483 | FCz | weak   | 2 | 40 | Old-High |
| 712 | 10.711 | 4.1159 | 9.413  | POz | weak   | 2 | 40 | Old-High |
| 713 | 8.5734 | 5.699  | 9.7165 | FCz | strong | 2 | 40 | Old-High |
| 714 | 7.3156 | 3.9645 | 8.922  | POz | strong | 2 | 40 | Old-High |
| 715 | 17.351 | 7.2505 | 11.919 | FCz | no     | 3 | 40 | Old-High |
| 716 | 18.305 | 4.9213 | 10.953 | POz | no     | 3 | 40 | Old-High |



|     |        |        |        |     |        |   |    |          |
|-----|--------|--------|--------|-----|--------|---|----|----------|
| 717 | 15.667 | 7.8466 | 12.21  | FCz | weak   | 3 | 40 | Old-High |
| 718 | 15.86  | 5.549  | 11.682 | POz | weak   | 3 | 40 | Old-High |
| 719 | 15.901 | 6.5523 | 12.357 | FCz | strong | 3 | 40 | Old-High |
| 720 | 15.942 | 4.9877 | 11.827 | POz | strong | 3 | 40 | Old-High |
| 721 | 11.391 | 13.083 | 20.59  | FCz | no     | 1 | 41 | Old-High |
| 722 | 12.417 | 14.852 | 14.998 | POz | no     | 1 | 41 | Old-High |
| 723 | 11.664 | 12.995 | 20.065 | FCz | weak   | 1 | 41 | Old-High |
| 724 | 14.134 | 16.253 | 16.091 | POz | weak   | 1 | 41 | Old-High |
| 725 | 11.704 | 14.356 | 17.816 | FCz | strong | 1 | 41 | Old-High |
| 726 | 15.23  | 15.913 | 14.44  | POz | strong | 1 | 41 | Old-High |
| 727 | 12.077 | 11.868 | 20.251 | FCz | no     | 2 | 41 | Old-High |
| 728 | 12.432 | 14.234 | 14.131 | POz | no     | 2 | 41 | Old-High |
| 729 | 12.907 | 13.114 | 18.288 | FCz | weak   | 2 | 41 | Old-High |
| 730 | 13.202 | 15.033 | 12.489 | POz | weak   | 2 | 41 | Old-High |
| 731 | 11.002 | 13.725 | 16.423 | FCz | strong | 2 | 41 | Old-High |
| 732 | 12.29  | 14.957 | 12.043 | POz | strong | 2 | 41 | Old-High |
| 733 | 12.955 | 12.65  | 22     | FCz | no     | 3 | 41 | Old-High |
| 734 | 11.685 | 12.715 | 14.945 | POz | no     | 3 | 41 | Old-High |
| 735 | 11.999 | 12.129 | 20.456 | FCz | weak   | 3 | 41 | Old-High |
| 736 | 11.572 | 14.516 | 13.605 | POz | weak   | 3 | 41 | Old-High |
| 737 | 12.193 | 13.69  | 17.299 | FCz | strong | 3 | 41 | Old-High |
| 738 | 12.62  | 13.885 | 12.435 | POz | strong | 3 | 41 | Old-High |
| 739 | 44.417 | 17.624 | 21.722 | FCz | no     | 1 | 42 | Old-High |
| 740 | 31.432 | 15.534 | 17.178 | POz | no     | 1 | 42 | Old-High |
| 741 | 51.721 | 17.546 | 20.552 | FCz | weak   | 1 | 42 | Old-High |
| 742 | 33.703 | 14.409 | 15.145 | POz | weak   | 1 | 42 | Old-High |
| 743 | 46.104 | 17.393 | 20.394 | FCz | strong | 1 | 42 | Old-High |
| 744 | 29.819 | 14.903 | 14.138 | POz | strong | 1 | 42 | Old-High |
| 745 | 51.249 | 18.521 | 24.199 | FCz | no     | 2 | 42 | Old-High |
| 746 | 39.101 | 15.906 | 18.095 | POz | no     | 2 | 42 | Old-High |
| 747 | 50.808 | 19.003 | 20.657 | FCz | weak   | 2 | 42 | Old-High |
| 748 | 31.907 | 15.57  | 15.695 | POz | weak   | 2 | 42 | Old-High |
| 749 | 47.149 | 17.171 | 19.634 | FCz | strong | 2 | 42 | Old-High |
| 750 | 29.42  | 13.399 | 13.864 | POz | strong | 2 | 42 | Old-High |
| 751 | 56.459 | 19.206 | 27.354 | FCz | no     | 3 | 42 | Old-High |
| 752 | 41.798 | 15.151 | 18.577 | POz | no     | 3 | 42 | Old-High |
| 753 | 52.479 | 19.201 | 24.07  | FCz | weak   | 3 | 42 | Old-High |
| 754 | 34.345 | 16.433 | 16.877 | POz | weak   | 3 | 42 | Old-High |
| 755 | 57.341 | 18.732 | 21.003 | FCz | strong | 3 | 42 | Old-High |
| 756 | 36.451 | 14.285 | 15.485 | POz | strong | 3 | 42 | Old-High |
